# Supplementary material for: Photophysical properties of tetrabutylammonium metal chlorides with different inorganic frameworks
Source: Royal Society of Chemistry journal article supplement (doi:10.1039/d2cc06988a), 2023-01-01
Supplement: d2cc06988a1.pdf [file d2cc06988a1.pdf]

## Supporting Information

### Photophysical properties of tetrabutylammonium metal chloride with different inorganic frameworks

#### Materials and chemicals

Lead chloride ( $\text{PbCl}_2$ , 99.99%), bismuth chloride ( $\text{BiCl}_3$ , 99.99%), antimony chloride ( $\text{SbCl}_3$ , 99.99%), stannic chloride pentahydrate ( $\text{SnCl}_4 \cdot 5\text{H}_2\text{O}$ , 99.0%), tetrabutylammonium chloride (TBAC, 99.0%), dimethylformamide (DMF, 99.8%), dichloromethane (DCM, 99.8%), absolute ethyl alcohol (EtOH, 99.8%), were purchased from Shanghai Aladdin Biochemical Technology Co., Ltd. Hydrochloric acid (HCl, 37%) was purchased from Harbin Polytechnic Chem. Reag. Co., Ltd. All of these raw materials were used without any further purification.

**Synthesis of (TBA) $\text{PbCl}_3$  (SC-Pb) single crystal:** Add 1 mmol of TBAC and 1 mmol of  $\text{PbCl}_2$  to the glass bottle, then add 4 mL of DMF and stir until completely dissolved to form a precursor solution. The glass bottle containing the precursor solution was placed in a large beaker containing DCM and sealed, and crystallization was carried out by the antisolvent DCM diffusion method.

**Synthesis of (TBA) $_3\text{Bi}_2\text{Cl}_9$  (SC-Bi) single crystal:** 0.5 mmol TBAC and 0.5 mmol  $\text{BiCl}_3$  dissolved in hydrochloric acid, and then the solution volatilized at room temperature in a glass bottle.

**Synthesis of (TBA) $_2\text{Sb}_2\text{Cl}_8$  (SC-Sb) single crystal:** 0.5 mmol TBAC and 0.5 mmol  $\text{SbCl}_3$  dissolved in hydrochloric acid, and then the solution volatilized at room temperature in a glass bottle.

**Synthesis of (TBA) $\text{SnCl}_5 \cdot 2\text{EtOH}$  (SC-Sn) single crystal:** 0.5 mmol TBAC and 0.5 mmol  $\text{SnCl}_4 \cdot 5\text{H}_2\text{O}$  dissolved in absolute ethyl alcohol, and then the solution volatilized at room temperature in a glass bottle.

**Synthesis of Liquid-Pb:** 1 mmol TBAC and 0.1 mmol  $\text{PbCl}_2$  dissolved DMF

**Synthesis of Liquid-Bi:** 1 mmol TBAC and 0.1 mmol  $\text{BiCl}_3$  dissolved DMF

**Synthesis of Film-Sb:** SC-Sb was dissolved in EtOH and then dried by dropping on a

glass slide.

**Single crystal X-ray diffraction (SCXRD).** Single crystal X-ray data for the (TBA)PbCl<sub>3</sub>, (TBA)<sub>3</sub>Bi<sub>2</sub>Cl<sub>9</sub>, (TBA)<sub>2</sub>Sb<sub>2</sub>Cl<sub>8</sub> and (TBA)<sub>2</sub>SnCl<sub>6</sub> were collected using a Bruker AXS diffractometer with Mo *K*α radiation.

**Powder X-ray diffraction (PXRD).** The PXRD analysis was performed on powder X-ray diffractometer (X'PERT Pro, Panalytical) equipped with Cu *K*α radiation. Simulated powder patterns were calculated by Material Studio 2017 software using the crystallographic information file (CIF) from single-crystal X-ray experiment.

**Energy dispersive spectrometry (EDS).** Energy dispersive spectrometry was performed on the accessories of a ZEISS G500 scanning electron microscope.

**Steady-state PL measurement.** The 405 nm continuous-wave (CW) laser (UV-FN-405-200mW, CNI) was used as an excitation light source for steady-state excitation. The steady-state PL spectra were collected by a spectrometer (HR4000CG-UV-NIR, Ocean Optics).

**Time-resolved photoluminescence (TRPL).** The PL dynamics are excited by 200-ps laser pulses at 405 nm and measured by a time-correlated single photon counting (TCSPC) systems from Boston Electronics with the time resolution of 200 ps to reveal the ultrafast process at the very beginning of the dynamics.

**Temperature-dependent PL measurement.** The temperature-dependent PL measurement was performed using a vacuum liquid-nitrogen cryostat (Cryo-77, Oriental Koji) and a temperature controller. The 405 nm continuous-wave (CW) laser (UV-FN-405-200mW, CNI) was used as an excitation light source, and spectrometer (HR4000CG-UV-NIR, Ocean Optics) is used to collect spectra.

**Fitted photo-phonon coupling constants ( $\gamma_{OL}$ ):** adopt the electron-phonon coupling model to evaluate the electron-phonon coupling strength with the following equation:

$$FWHM = \Gamma_0 + \gamma_{ac}T + \gamma_{LO} \left( e^{E_{LO}/k_B T} - 1 \right)^{-1} \quad (1)$$

where  $\Gamma_0$  is the nonuniform broadening contribution at 0 K, which is independent of temperature.  $\gamma_{ac}T$  is the homogeneous broadening term, which arises from acoustic phonon scattering through the deformation potential with charge electronic-acoustic

phonon coupling strength of  $\gamma_{ac}$ . The whole third term represents the longitudinal optical phonon (Fröhlich) interactions. And corresponding  $\gamma_{OL}$  and  $E_{LO}$  are electronic-optical phonon coupling constant and the phonon energy, respectively.

**Fitted lifetime ( $\tau$ ):** The experimental data can be fitted by the following double exponential decay.  $I(t)$  and the average lifetime ( $\tau$ ) can be described as,

$$I(t) = A + \int_0^t \left( B e^{-(t-t')\tau_1} + C e^{-(t-t')\tau_2} \right) e^{-(t'/\tau_{fwhm})} dt' \quad (2)$$

$$\tau = (B\tau_1^2 + C\tau_2^2) / (B\tau_1 + C\tau_2) \quad (3)$$

where  $I(t)$  is the normalized PL intensity at time  $t$ .  $A$  is the baseline of PL, while  $B$  and  $C$  are the amplitudes of the entire normalized PL.  $\tau_1$  and  $\tau_2$  are the short-lifetime and long-lifetime components of PL, respectively. The instrumental response function (IRF) is considered as a Gaussian function to convolute with the PL decays. The width of IRF  $\tau_{fwhm}$  is recorded at the wavelength of the excitation.

**Table S1.** Crystal data and structure refinement for SC-Bi, SC-Sb and SC-Sn

| Compound                                     | SC-Bi                                                                           | SC-Sb                                                                          | SC-Sn                                                             |
|----------------------------------------------|---------------------------------------------------------------------------------|--------------------------------------------------------------------------------|-------------------------------------------------------------------|
| Chemical formula                             | C <sub>48</sub> H <sub>108</sub> N <sub>3</sub> Bi <sub>2</sub> Cl <sub>9</sub> | C <sub>32</sub> H <sub>72</sub> N <sub>2</sub> Sb <sub>2</sub> Cl <sub>8</sub> | C <sub>20</sub> H <sub>48</sub> NO <sub>2</sub> SnCl <sub>5</sub> |
| Formula weight                               | 1464.38                                                                         | 1012.01                                                                        | 630.53                                                            |
| Temperature                                  | 296(2) K                                                                        | 296(2)K                                                                        | 296(2)                                                            |
| Space group                                  | P2 <sub>1</sub> /n                                                              | P2 <sub>1</sub> /c                                                             | P-1                                                               |
| <i>a</i> /Å                                  | 11.3458(11)                                                                     | 18.688(8)                                                                      | 11.1104(19)                                                       |
| <i>b</i> /Å                                  | 22.317(2)                                                                       | 13.552(5)                                                                      | 12.108(2)                                                         |
| <i>c</i> /Å                                  | 28.552(3)                                                                       | 19.240(8)                                                                      | 13.108(3)                                                         |
| <i>α</i> °                                   | 90                                                                              | 90                                                                             | 109.091(4)                                                        |
| <i>β</i> °                                   | 96.561(2)                                                                       | 101.902(9)                                                                     | 105.943(4)                                                        |
| <i>γ</i> °                                   | 90                                                                              | 90                                                                             | 94.281(4)                                                         |
| Volume/Å <sup>3</sup>                        | 7182.4(12)                                                                      | 4768(3)                                                                        | 1575.8(5)                                                         |
| Density/g·cm <sup>-3</sup>                   | 1.354                                                                           | 1.410                                                                          | 1.329                                                             |
| F(000)                                       | 2944                                                                            | 2064                                                                           | 652                                                               |
| Data collection range                        | 2.216< <i>θ</i> <25.219                                                         | 2.227< <i>θ</i> <25.007                                                        | 2.401< <i>θ</i> <25.204                                           |
| Index ranges                                 | -12 ≤ <i>h</i> ≤ 13                                                             | -21 ≤ <i>h</i> ≤ 22                                                            | -13 ≤ <i>h</i> ≤ 13                                               |
|                                              | -26 ≤ <i>k</i> ≤ 26                                                             | -13 ≤ <i>k</i> ≤ 16                                                            | -14 ≤ <i>k</i> ≤ 14                                               |
|                                              | -33 ≤ <i>l</i> ≤ 34                                                             | -22 ≤ <i>l</i> ≤ 20                                                            | -15 ≤ <i>l</i> ≤ 15                                               |
| Independent reflections                      | 12796 [ <i>R</i> <sub>int</sub> =0.1686]                                        | 8335 [ <i>R</i> <sub>int</sub> =0.0814]                                        | 5616 [ <i>R</i> <sub>int</sub> =0.0663]                           |
| Data/restraints/parameters                   | 12796/313/559                                                                   | 8335/2/405                                                                     | 5616/145/262                                                      |
| Final R indices [ <i>I</i> >=2σ( <i>I</i> )] | <i>R</i> <sub>1</sub> = 0.0963 <sup>a</sup>                                     | <i>R</i> <sub>1</sub> = 0.0535                                                 | <i>R</i> <sub>1</sub> = 0.0705                                    |
|                                              | <i>wR</i> <sub>2</sub> = 0.1305 <sup>b</sup>                                    | <i>wR</i> <sub>2</sub> = 0.1345                                                | <i>wR</i> <sub>2</sub> = 0.1624                                   |
| <i>R</i> indexes [all data]                  | <i>R</i> <sub>1</sub> = 0.2127                                                  | <i>R</i> <sub>1</sub> = 0.1198                                                 | <i>R</i> <sub>1</sub> = 0.1381                                    |
|                                              | <i>wR</i> <sub>2</sub> = 0.164                                                  | <i>wR</i> <sub>2</sub> = 0.1764                                                | <i>wR</i> <sub>2</sub> = 0.1940                                   |
| Largest diff. peak and hole                  | 0.976 and<br>-0.799 e·Å <sup>-3</sup>                                           | 0.652 and<br>-0.644 e·Å <sup>-3</sup>                                          | 0.735 and<br>-0.523 e·Å <sup>-3</sup>                             |

a)  $R_1 = \frac{\sum ||F_o| - |F_c||}{\sum |E_o| \cdot b}$   $wR_2 = [\frac{\sum w(F_o^2 - F_c^2)^2}{\sum w(F_o^2)^2}]^{1/2}$ .

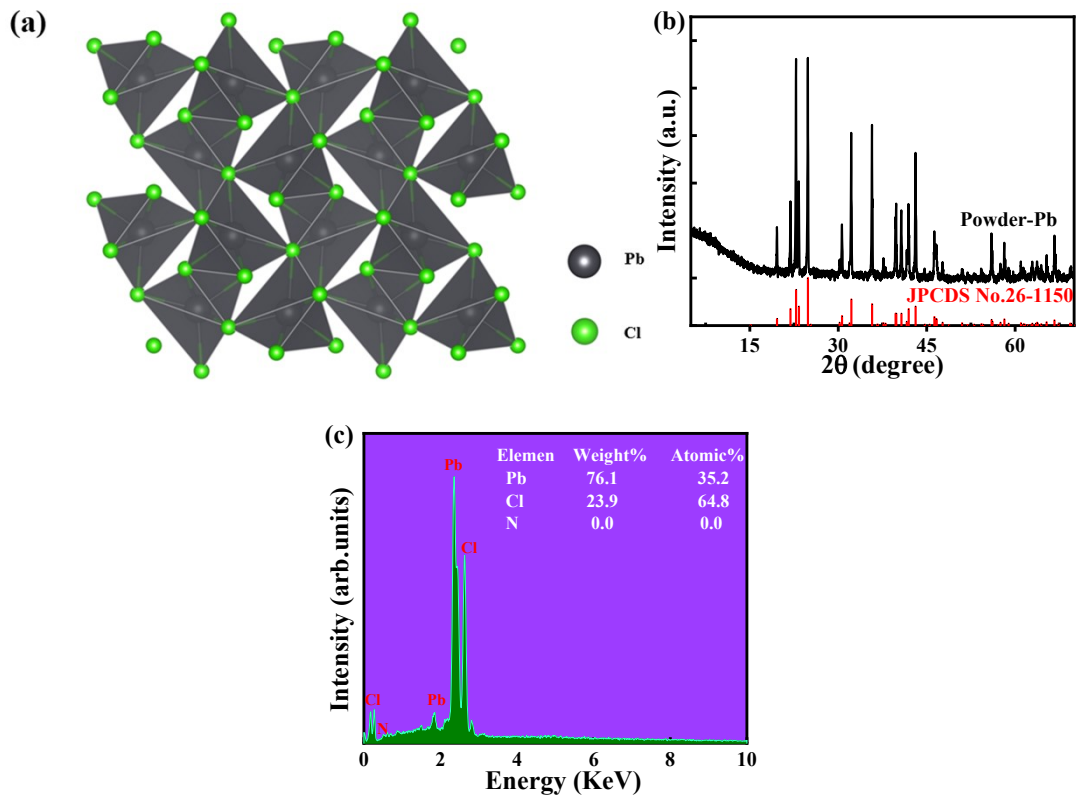

Fig. S1 (a) Schematic diagram of the crystal structure of SC-Pb (b) Powder XRD of SC-Pb and standard card of cotunnite. (c) EDS of SC-Pb.

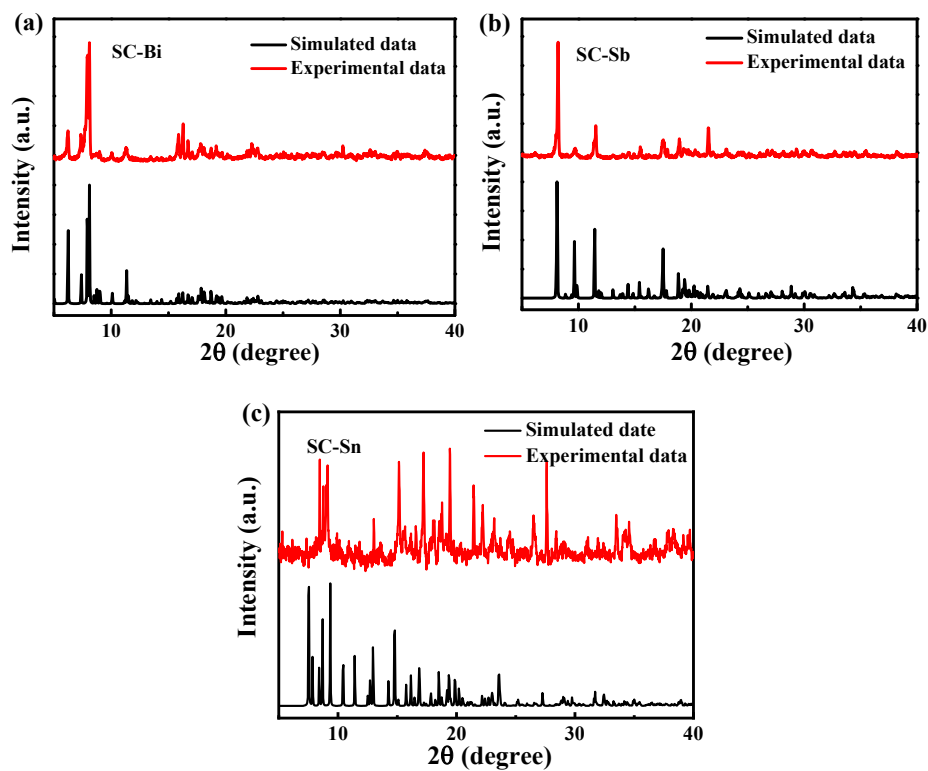

Fig. S2 The simulated and experimental powder XRD patterns of SC-Bi (a), SC-Sb (b) and SC-Sn (c), respectively.

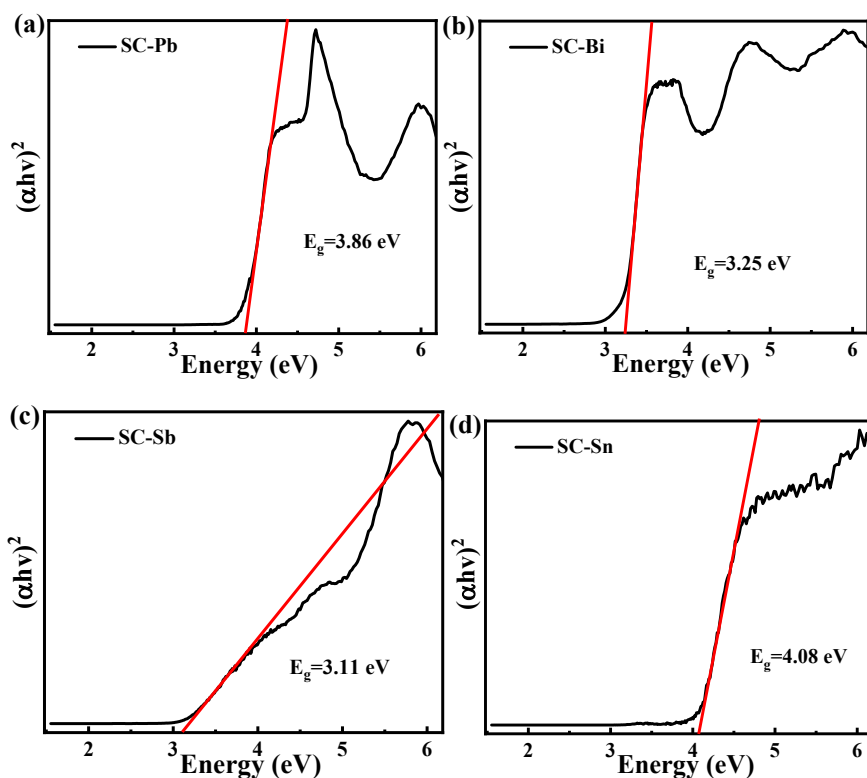

Fig. S3 The optical band gap is calculated by the Tauc-plot formula based on the absorption spectra. the band gap obtained of (a) SC-Pb, (b) SC-Bi, (c) SC-Sb, (d)SC-Sn.

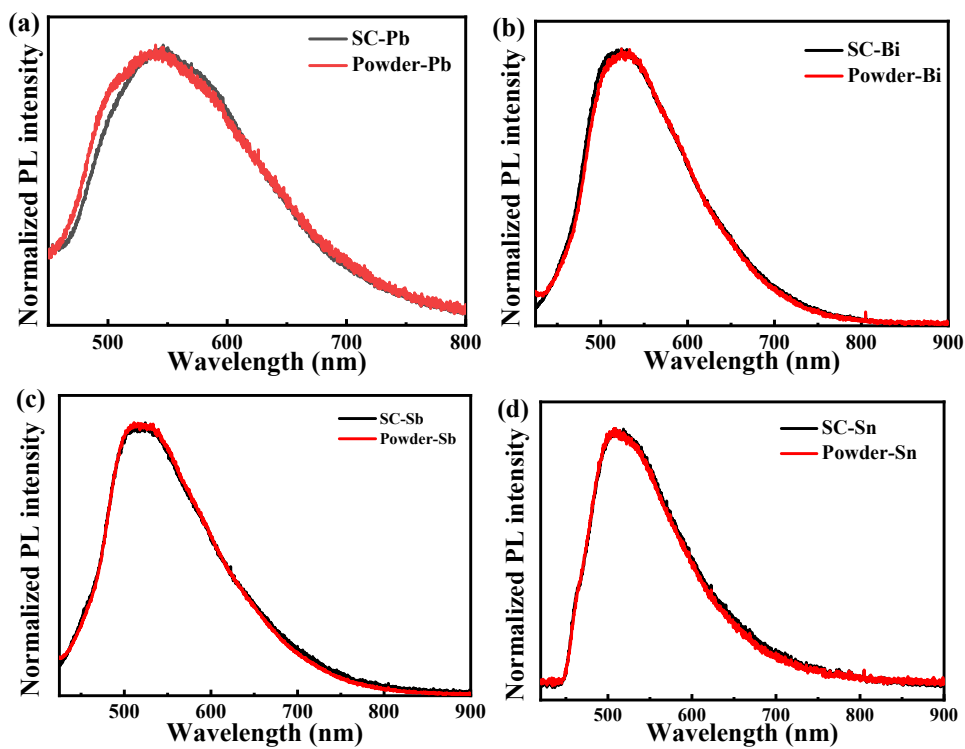

Fig. S4 The spectra of PL of SC-Pb (a), SC-Bi (b), SC-Sb (c), SC-Sn (d) and PL spectra of their ground into powder, respectively.

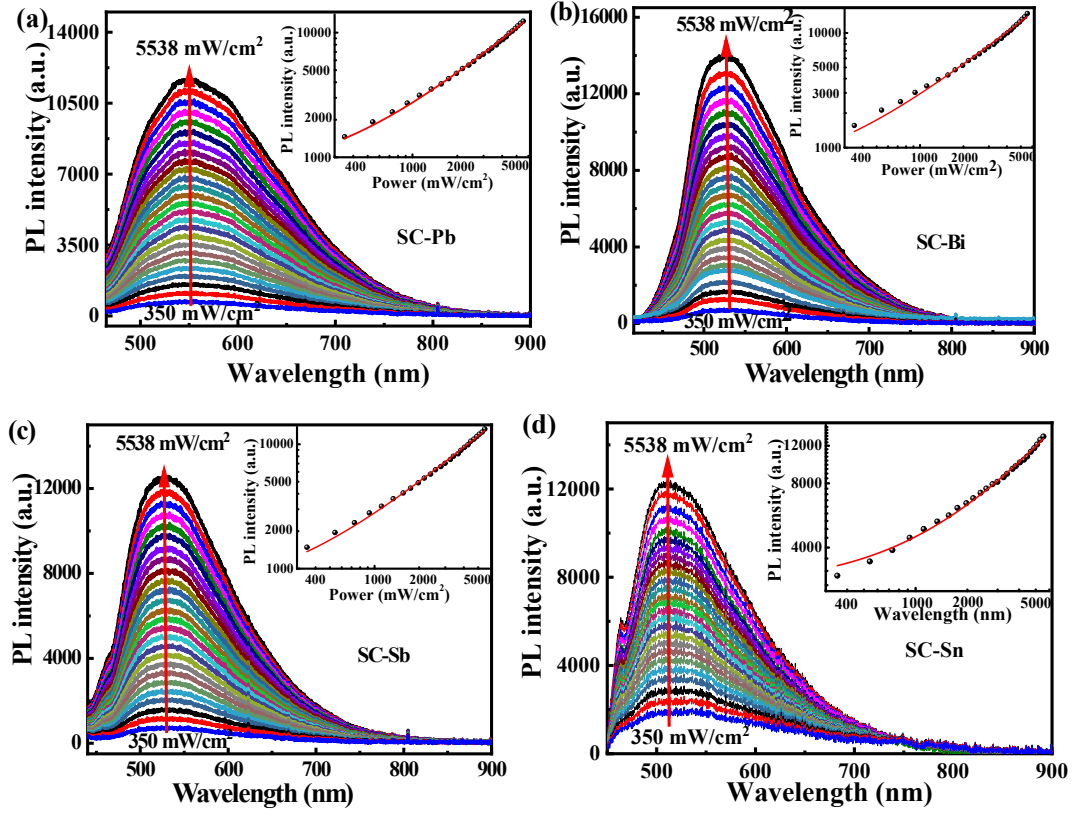

Fig. S5 The power-dependent PL spectra of SC-Pb (a), SC-Bi (b), SC-Sb (c) and SC-Sn (d), respectively.

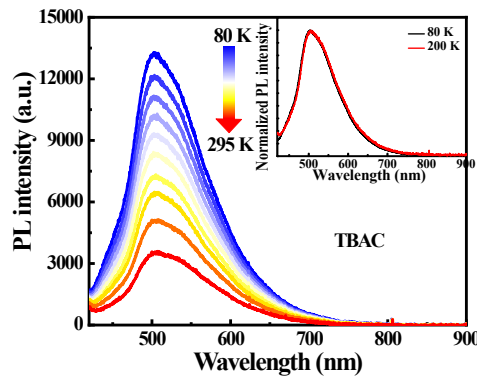

Fig. S6 PL spectra of TBAC at different temperature, inset shows the normalized spectra at 80 K and 200 K.
